# Supplementary material for: Plasma sex hormone-binding globulin predicts neurodegeneration and clinical progression in prodromal Alzheimer's disease
Source: publisher site journal article supplement (doi:10.18632/aging.103497), 2020-07-21
Supplement: Supplementary file [file aging-v12i14-103497-supplementary-material-SD1.pdf]

## SUPPLEMENTARY FIGURE

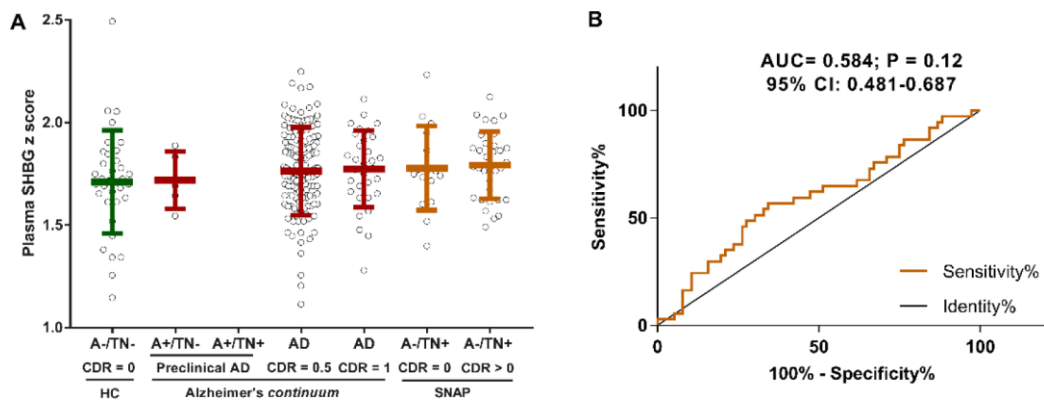

**Supplementary Figure 1. Plasma SHBG is not a clinical diagnostic biomarker for mild AD dementia.** No significant difference in plasma SHBG was found between HC and mild AD groups (A). We also assessed the diagnostic accuracy of plasma SHBG to discriminate between AD and HC. To this regard, a receiver operating characteristic (ROC) curve analysis was undertaken. The area under the curve was 0.584 (95% CI 0.481-0.687,  $p = 0.12$ , B).
